1 Zooplankton community beta diversity in an Amazonian floodplain lake

2

3 Leonardo Fernandes Gomes<sup>1\*</sup>, Ana Caroline Alcântara Missias Gomes<sup>1</sup>, Carla Albuquerque de  
4 Souza<sup>1</sup>, Hasley Rodrigo Pereira<sup>1</sup>, Marie-Paule Bonnet<sup>2,3</sup>, Ludgero Cardoso Galli Vieira<sup>1</sup>

5

6 <sup>1</sup>Núcleo de Estudos e Pesquisas Ambientais e Limnológicas - NEPAL, Faculdade UnB de Planaltina,  
7 Área Universitária 1, Vila Nossa Senhora de Fátima, 73.345-010 – Planaltina – DF, Brasil

8 <sup>2</sup>Geosciences Environnement Toulouse (UMR 5563 GET), IRD/ CNRS/ Université Toulouse III,  
9 Toulouse, France.

10 <sup>3</sup>International Joint Laboratory Observatoire des Changements Environnementaux LMI OCE, IRD –  
11 Universidade de Brasília, Campus Universitário Darcy Ribeiro, CEP 70910-900 Brasília, Brazil.

12

13 \*Corresponding author: [leof.ciamb@gmail.com](mailto:leof.ciamb@gmail.com) (e-mail)

14

15 Keywords: Lago Grande do Curuai, hydrological cycle, Podani, flood pulse, beta diversity  
16 partitioning

17

## 18 **Abstract**

19

20 Understanding the mechanisms that generate organism distribution patterns from the beta diversity  
21 perspective can assist in environmental monitoring strategies. In this study, we emphasized the limnic  
22 zooplankton due to the ability of these organisms to respond quickly to environmental variations.  
23 Therefore, we evaluated the following questions: (i) Do different regions of the same lake have the  
24 same importance in contributing to beta diversity? (ii) Do beta diversity and its components vary over  
25 the hydrological cycle? (iii) What is the importance of local and spatial predictors in beta diversity  
26 and its components? (iv) Do beta diversity and its components show a consistent pattern throughout  
27 the hydrological cycle? We found that the contribution of different sites to diversity was more  
28 associated with regions with low abundance and richness of organisms values, such as the littoral and  
29 *igarapés*, which shows the relevance of these areas for biological monitoring and for the delimitation  
30 of priority areas for the zooplankton diversity conservation. Despite the peculiarities of each  
31 hydrological period and regarding beta diversity components, we verified a species substitution and  
32 differences in abundance pattern in the lake. We also found low concordance patterns between the  
33 periods and low environmental and spatial variables prediction on beta diversity patterns.

34

## 35 **Introduction**

36

37 Species can present different distribution patterns in response to natural factors such as  
38 competition, predation, dispersive processes limitations, and/or local and regional environmental  
39 variables influences (Guisan & Thuiller, 2005). These factors may be intensified by human activities,  
40 which makes even more relevant to understand the mechanisms that generate such structuring patterns  
41 in biological communities. Thus, the understanding of these mechanisms can assist in the formulation  
42 of efficient environmental monitoring strategies and, even, in the delimitation of priority areas for  
43 conservation in several ecosystems (Socolar *et al.*, 2016). The comparative diversity across multiple  
44 sites, known as beta diversity (Whittaker, 1960), has undergone advances over the years both for  
45 understanding patterns of presence-absence of organisms and for density values per site (Baselga,  
46 2010; Podani & Schmera, 2011; Podani, Ricotta & Schmera, 2013).

47 Both for organism occurrence and abundance, Podani family of beta diversity (Podani &  
48 Schmera, 2011; Podani *et al.*, 2013) can be partitioned into the following main components: (i)  
49 *species similarities*: commonly measured by the Jaccard index for presence-absence data and  
50 Ruzicka, for abundance data. High values of this partition mean that the pairs of sites put in  
51 comparison share many species or species with similar abundances; (ii) *difference in relative*  
52 *richness/abundance*: is the difference in species richness, or species abundance, between pairs of

53 sites. Therefore, high values of that partition show that the number of species or specimens between  
54 compared sites is discrepant; (iii) *species replacement/abundance*: it can be maximized when there is  
55 a high replacement of species, or species with equivalent abundances, along an environmental  
56 gradient or between pairs of sites. Therefore, high replacement values for the abundance data mean  
57 that, although the sites in comparison have similar abundances, the species composition is different.  
58 Also, although the approach with abundance data may represent more subtle differences concerning  
59 environmental variations, the values between the assessments for abundance and presence-absence  
60 data can be quite different, even if evaluated with the same data set (Podani *et al.*, 2013).

61 The evaluation of the factors that influence beta diversity and its components can be even  
62 more complex in floodplain lakes since they are predominantly dominated by the flood pulse that  
63 controls the dynamics of entry and output of sediments, water and organisms that naturally contribute  
64 for changes in biological diversity in the ecosystem (Junk *et al.*, 2012). These plains are continuously  
65 or periodically flooded by direct precipitation or by the overflow of the main river and, depending on  
66 the level of connectivity with the river, there may be a loss of connection between habitats during  
67 periods of low water (Thomaz, Bini & Bozelli, 2007). However, as the cycle of extensive floodplains  
68 is usually slow and monomodal, the biological dynamics of organisms can adapt in order to maximize  
69 their performance according to hydrological cycles (Junk *et al.*, 2011).

70 In Amazonian rivers, the flow tends to be more intense and requires a high resilience capacity  
71 of the organisms. Therefore, smaller aquatic organisms tend to be present with greater richness and  
72 density in the lakes of these plains, where they can find shelter against predation and food (Junk,  
73 Bayley & Sparks, 1989). Furthermore, according to the hydrological period, these organisms may  
74 present beta diversity patterns that change over time (Bozelli *et al.*, 2015).

75 Assessing beta diversity and its components over space, but also highlighting whether the  
76 pattern generated is consistent throughout the hydrological cycle is important in different aspects. For  
77 example, due to the scarcity of financial resources and time allocated in environmental monitoring  
78 programs and scientific research, if different hydrological periods show a concordant pattern of  
79 diversity, there is a real possibility of adjustment in the sampling effort, reducing the number of  
80 sampling campaigns, which would save financial resources and time. In the same way, it is possible  
81 to use other alternatives as is the case of using lower taxonomic resolutions and or presence-absence  
82 data instead of abundance data (Carneiro *et al.*, 2013; Vieira *et al.*, 2017; de Morais *et al.*, 2018).

83 In this study, we emphasized the limnic zooplankton due to the ability of these organisms to  
84 respond quickly to environmental variations. Therefore, we evaluated the following questions: (i) Do  
85 different regions of the same lake have the same importance in contributing to beta diversity? (ii) Do  
86 beta diversity and its components vary over the hydrological cycle? (iii) What is the importance of  
87 local (environmental characterization) and spatial (dispersive processes) predictors in beta diversity

88 and its components? (iv) Do beta diversity and its components show a consistent pattern throughout  
89 the hydrological cycle? Taking into account that the ecological dynamics of floodplains is temporally  
90 complex, we expected that the sites contribution to beta diversity would be different between  
91 hydrological periods. Besides, due to the spatial extent of the study area, we expected that species  
92 replacement patterns would be predominant, considering values of presence-absence of organisms,  
93 and patterns of differences in abundance, considering values of species abundance per site. Also, due  
94 to the complex interactions that dominate the occurrence of organisms, we expected that there would  
95 be a variation between environmental and spatial predictors in biological diversity patterns and,  
96 finally, as each period comprises a different hydrological dynamics, we did not expect to find many  
97 concordant values, being important to evaluate in all hydrological periods to understand the  
98 distribution patterns of the zooplankton community.

99

## 100 **Material and methods**

### 101 Study area

102

103 The study area comprises an Amazonian floodplain lake called *Lago Grande do Curuai*,  
104 located in the State of Pará, Brazil. The majority of the water supply comes from the Amazon River  
105 (77%), while the others are subdivided between rainfall, runoff, and outcropping of groundwater  
106 (Bonnet *et al.*, 2008). The hydrological dynamics generate a monomodal cycle in this lake,  
107 comprising the periods of flooding (from January to the end of February), high water (from April to  
108 the end of June), flushing (from August to October) and low water (mid-October to November) (de  
109 Moraes Novo *et al.*, 2006).

110 The environmental characteristics of Lago Grande do Curuai are quite variable throughout the  
111 year, mainly concerning chlorophyll-*a* and dissolved oxygen. During the flooding period,  
112 chlorophyll-*a* levels are low enough for human consumption. However, the values in the flushing  
113 period rise to such an extent that water is not recommended for any type of activity (Affonso, Barbosa  
114 & Novo, 2011).

115 Sampling were carried out in 17 sample units (Figure 1) in four campaigns: March / 2013  
116 (flooding period), September / 2013 (flushing period), May / 2014 (high water period) and November  
117 / 2014 (low water period).

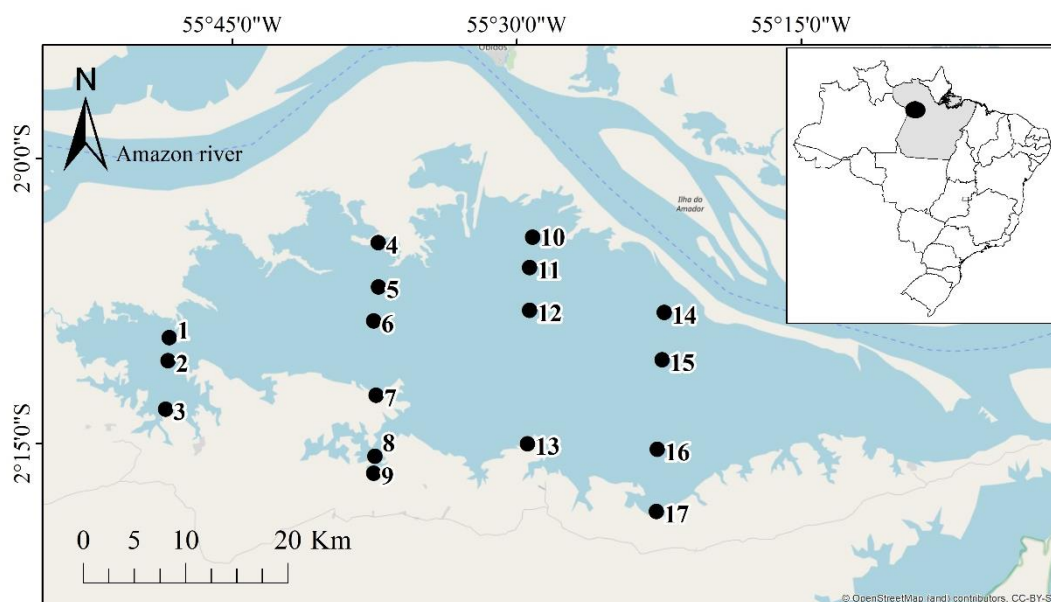

118

119 **Fig. 1** Map of the study area and sampling units in Lago Grande do Curuai. Blue area: aquatic  
120 environments; beige area: terrestrial environments

121

122 Environmental variables

123

124 In each sampling unit, we used a multi-parameter YSY probe, model EXO2 to measure the  
125 variables dissolved oxygen (mg/L), blue-green algae ( $\mu\text{g/L}$ ), fluorescent organic dissolved matter  
126 (raw), pH, water temperature ( $^{\circ}\text{C}$ ), conductivity ( $\mu\text{S/cm}$ ), total dissolved solids (mg/L), and turbidity  
127 (NTU). According to the protocol (APHA, 2005), water samples were obtained and frozen for further  
128 quantification in the laboratory of: alkalinity (mg/L), total chlorophyll ( $\mu\text{g/L}$ ), total phosphorus  
129 ( $\mu\text{g/L}$ ), total nitrogen ( $\mu\text{g/L}$ ), total dissolved nitrogen (mg/L), ammonia (mg/L), nitrate (mg/L), and  
130 silica (mg/L).

131

132 Zooplankton

133 In each sampling unit, we sampled the zooplankton community on the subsurface (*ca* 50 cm).  
134 Therefore, we filtered 300 liters of water in a net with a 68  $\mu\text{m}$  opening mesh. Samples were stored  
135 in polyethylene bottles, preserved with formaldehyde (5%), and buffered with sodium tetraborate. In  
136 the laboratory, the samples were concentrated in 75 mL. To quantify the densities of zooplanktonic  
137 organisms per sample unit, a 7.5 mL subsampling was performed with a *Hensen-Stempel* pipette. We  
138 read the subsampled organisms in a Sedgewick Rafter chamber for identification and counting using  
139 an optical microscope. Additionally, we carried out qualitative sampling to verify and record the  
140 existence of new *taxa* that were not identified during quantitative sampling (Bottrell *et al.*, 1976).

141

142 Data analysis

143

144 We performed a Local Contribution to Beta Diversity (LCBD) (Borcard, Gillet & Legendre,  
145 2018) to obtain the degree of exclusivity of the sites in the species composition in each hydrological  
146 period using the function *beta.div*, package *adespatial* (Dray *et al.*, 2018). To evaluate and partition  
147 Podani family beta diversity by sample period, we used the function *beta.div.comp* of *adespatial*  
148 package (Dray *et al.*, 2018). In both cases, we used the *Jaccard* index for presence and absence values  
149 and *Ruzicka* for organism density data.

150 To verify if there were significant differences in the values resulting from the beta diversity  
151 partitioning by period, we performed a Permutational Multivariate Analysis of Variance Using  
152 Distance Matrices (PERMANOVA). We obtained these matrices using the *beta.div.comp* function for  
153 both create a matrix encompassing all periods and generate matrices by pairs of periods. For  
154 PERMANOVA, we use the *adonis2* function of the *vegan* package (Oksanen *et al.*, 2016) and the  
155 matrices resulted from the partition were inserted in response to hydrological periods. Additionally,  
156 we constructed triangular plots (simplex) to check the distributions of the pairs of sites concerning  
157 the partitive components of beta diversity for both *Ruzicka* distance matrices and *Jaccard* in each  
158 hydrological periods.

159 To assess the influence of environmental and spatial variables in the beta diversity partitions  
160 of zooplankton community by hydrological period, we performed Distance-Based Redundancy  
161 Analysis (dbRDA's) (Legendre & Andersson, 1999) with different matrices resulted from the beta  
162 diversity partitioning (as response variables) and different environmental and spatial variables (as  
163 predictor variables). To determine which variables would be inserted in the dbRDA, we performed  
164 the analysis of variation inflation factor (VIF) (Borcard *et al.*, 2018), removing the environmental  
165 variables that showed high collinearity in each sample period (VIF values greater than 20). To  
166 determine the spatial predictors (geographic coordinates), we first converted the coordinates to  
167 Cartesian distances using the *geoXY* function of the *SoDA* package (Chambers, 2013). Then, we  
168 ordered the variables in a Distance-Based Moran's Eigenvector Maps (dbMEM) (Dray, Legendre &  
169 Peres-Neto, 2006; Legendre & Legendre, 2012) using the *dbmem* function of the *adespatial* package  
170 (Dray *et al.*, 2018).

171 To evaluate the temporal concordance in the distribution patterns of the different zooplankton  
172 community beta diversity partitions between hydrological periods, we performed *Procrustes* tests  
173 (Gower, 1975). For that, we ordered the matrices resulting from the beta diversity partitioning in  
174 different Non-metric multidimensional scaling (NMDS), then we extracted the values from the  
175 ordering scores and inserted them into the *protest* function, from *vegan* package (Oksanen *et al.*,  
176 2013). To check the significance, 9999 permutations were performed.

177 For all the mentioned analyzes, we used the statistical software R (R Core Team, 2016).

178

## 179 Results

180

181 Regarding the contribution of sites to beta diversity (LCBD) using presence-absence data of  
182 the zooplankton community, only the hydrological periods of flooding and low water presented sites  
183 with significant contributions, with site 9 being important for the beta diversity in both periods (Figure  
184 2). All significant sites (8, 9, and 13) are located in the southern region of the lake. When we evaluated  
185 the LCBD using abundance data (Figure 3), the four periods presented significant sample units. In  
186 the flooding and flushing periods, the significant sampling units were located in the north region of  
187 the lake (sites 14 and 10, respectively); in the high waters, they were located in the south, and in the  
188 low water period they were located in the west region of the lake.

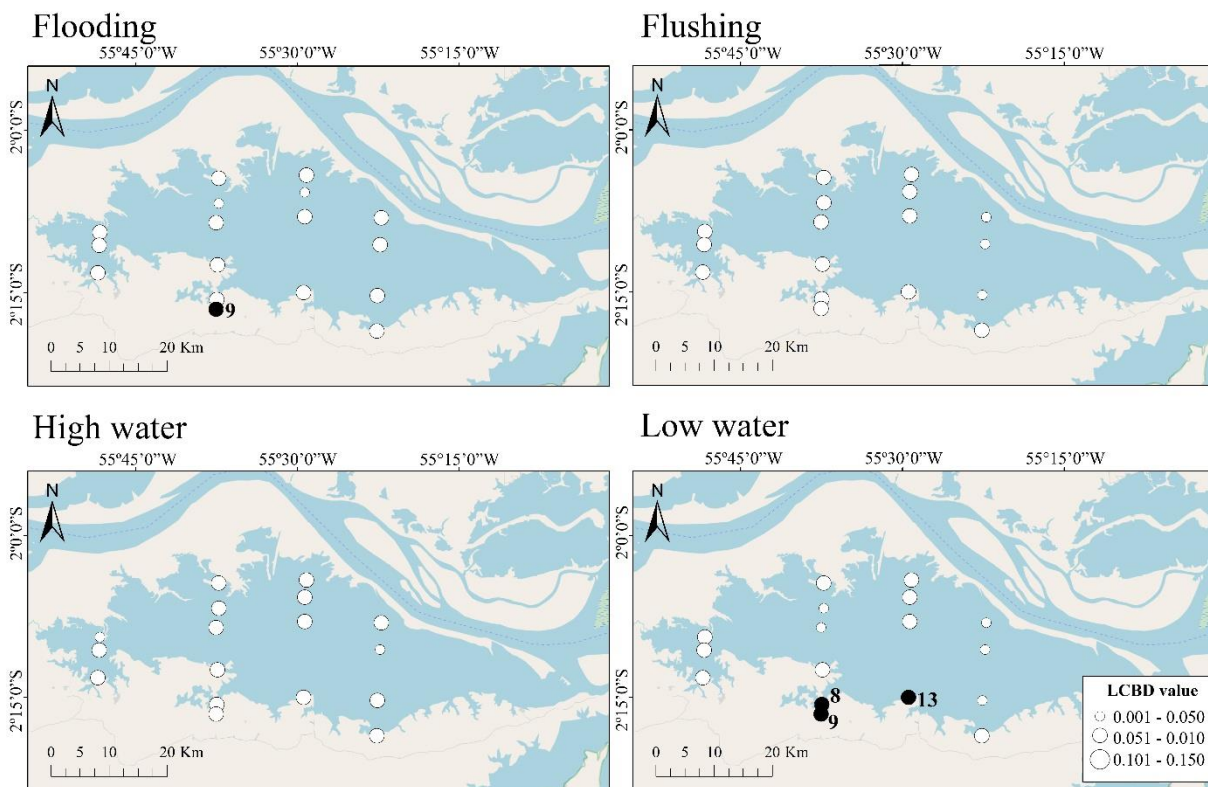

189

190 **Fig. 2** Map of the local contribution to beta diversity (LCBD) for zooplankton presence/absence data  
191 with *Jaccard* matrix of the sample units by hydrological period. Filled circles represent sites with  
192 significant contributions

193

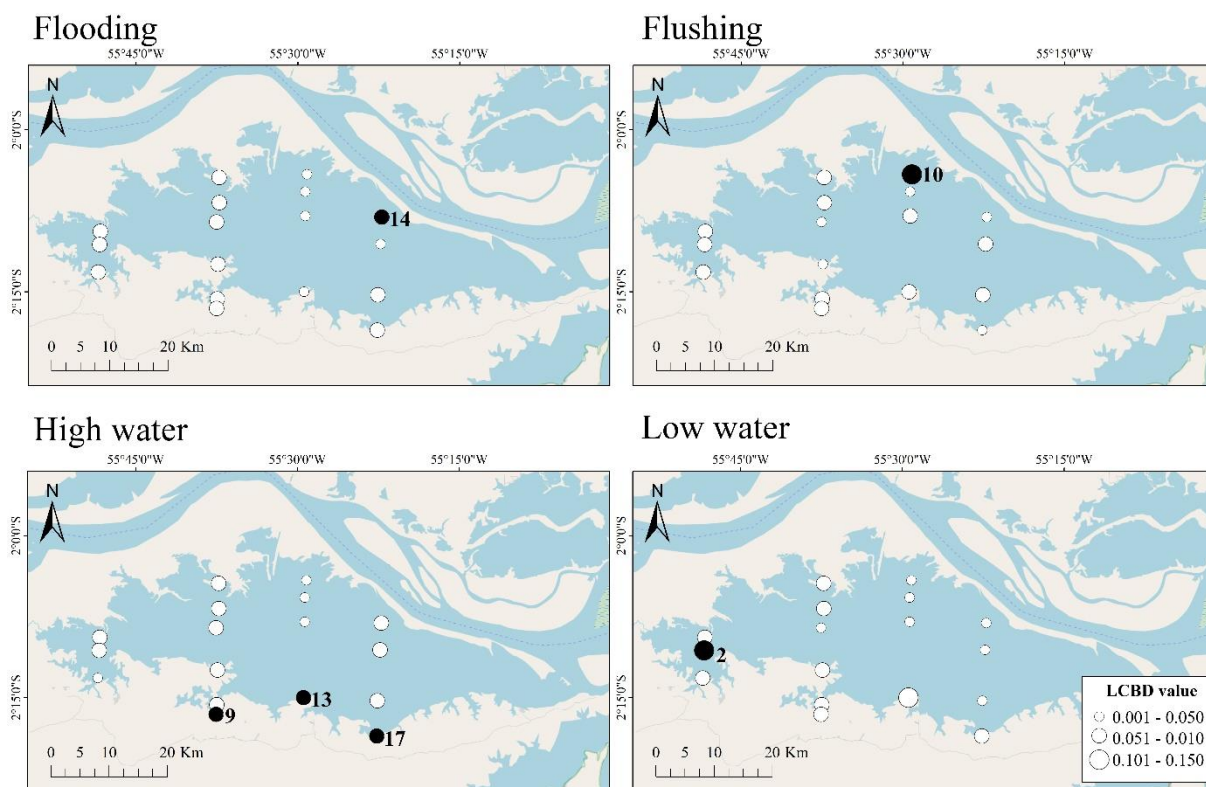

194

195 **Fig. 3** Map of the local contribution to beta diversity (LCBD) for zooplankton abundance data with  
 196 Ruzicka matrix of the sample units by hydrological period. Filled circles represent sites with  
 197 significant contributions

198

199 Evaluating the beta diversity partitions using presence and absence species data (Table 1), we  
 200 verified a replacement dominant pattern (values comprised 73% to 81% of the beta diversity between  
 201 hydrological periods), while we verified an abundance difference dominance pattern when using  
 202 abundance data (values comprised 58% to 74% of the beta diversity between hydrological periods).

203

204 **Table 1.** Beta diversity partitioning for all hydrological periods with presence and absence and  
 205 abundance values. BD = total beta diversity; Rep = replacement; RD = richness difference; AD =  
 206 abundance difference; Rep/BD = ratio of replacement to total beta diversity; RD/BD = ratio of  
 207 richness difference to total beta diversity; AD/BD = ratio of abundance difference to total beta  
 208 diversity

209

|                                        | Period     | BD   | Rep  | RD   | Rep/BD | RD/BD |
|----------------------------------------|------------|------|------|------|--------|-------|
| Presence-Absence<br>( <i>Jaccard</i> ) | Flooding   | 0.34 | 0.25 | 0.09 | 0.73   | 0.27  |
|                                        | Flushing   | 0.28 | 0.23 | 0.05 | 0.81   | 0.19  |
|                                        | High water | 0.35 | 0.27 | 0.09 | 0.75   | 0.25  |



|                                 | Low water     | 0.28      | 0.22       | 0.06      | 0.78          | 0.22         |
|---------------------------------|---------------|-----------|------------|-----------|---------------|--------------|
|                                 | <b>Period</b> | <b>BD</b> | <b>Rep</b> | <b>AD</b> | <b>Rep/BD</b> | <b>AD/BD</b> |
| Abundance<br>( <i>Ruzicka</i> ) | Flooding      | 0.43      | 0.14       | 0.29      | 0.32          | 0.68         |
|                                 | Flushing      | 0.38      | 0.15       | 0.23      | 0.40          | 0.60         |
|                                 | High water    | 0.41      | 0.11       | 0.31      | 0.26          | 0.74         |
|                                 | Low water     | 0.36      | 0.15       | 0.21      | 0.42          | 0.58         |

210

211

212 When we compared the beta diversity partitions obtained by the hydrological periods (Table  
 213 2) using presence/absence data, the richness difference component was similar among all  
 214 hydrological periods, while the beta diversity and replacement component were different among them  
 215 all. When considering abundance data, beta diversity was different across all hydrological periods,  
 216 while the abundance difference component was different only in flooding and flushing periods,  
 217 flushing and high water, and high waters and low waters. There were no differences in the abundance  
 218 replacement component.

219

220 **Table 2.** Permutational multivariate analysis of variance using distance matrices (PERMANOVA)  
 221 between the matrices resulting from the partition of the beta diversity for the different hydrological  
 222 periods. Significant values are in bold

|                  | Period                 | Beta diversity (Jaccard)          |              |              | Richness difference   |             |              | Replacement           |              |              |
|------------------|------------------------|-----------------------------------|--------------|--------------|-----------------------|-------------|--------------|-----------------------|--------------|--------------|
|                  |                        | <i>R</i> <sup>2</sup>             | <i>F</i>     | <i>p</i>     | <i>R</i> <sup>2</sup> | <i>F</i>    | <i>p</i>     | <i>R</i> <sup>2</sup> | <i>F</i>     | <i>p</i>     |
| Presence-absence | Global                 | <b>0.31</b>                       | <b>9.78</b>  | <b>0.001</b> | -0.04                 | -0.79       | 1.000        | <b>0.38</b>           | <b>12.84</b> | <b>0.001</b> |
|                  | Flooding x Flushing    | <b>0.21</b>                       | <b>8.58</b>  | <b>0.001</b> | -                     | -           | -            | <b>0.27</b>           | <b>11.90</b> | <b>0.001</b> |
|                  | Flooding x High water  | <b>0.18</b>                       | <b>7.15</b>  | <b>0.001</b> | -                     | -           | -            | <b>0.22</b>           | <b>9.27</b>  | <b>0.001</b> |
|                  | Flooding x Low water   | <b>0.25</b>                       | <b>10.66</b> | <b>0.001</b> | -                     | -           | -            | <b>0.32</b>           | <b>15.26</b> | <b>0.001</b> |
|                  | Flushing x High water  | <b>0.24</b>                       | <b>9.87</b>  | <b>0.001</b> | -                     | -           | -            | <b>0.27</b>           | <b>12.01</b> | <b>0.001</b> |
|                  | Flushing x Low water   | <b>0.25</b>                       | <b>10.43</b> | <b>0.001</b> | -                     | -           | -            | <b>0.30</b>           | <b>13.66</b> | <b>0.001</b> |
|                  | High water x Low water | <b>0.28</b>                       | <b>12.49</b> | <b>0.001</b> | -                     | -           | -            | <b>0.33</b>           | <b>15.50</b> | <b>0.001</b> |
|                  | Period                 | Beta diversity ( <i>Ruzicka</i> ) |              |              | Abundance difference  |             |              | Replacement           |              |              |
|                  |                        | <i>R</i> <sup>2</sup>             | <i>F</i>     | <i>p</i>     | <i>R</i> <sup>2</sup> | <i>F</i>    | <i>p</i>     | <i>R</i> <sup>2</sup> | <i>F</i>     | <i>p</i>     |
| Abundance        | Global                 | <b>0.20</b>                       | <b>5.32</b>  | <b>0.001</b> | <b>0.27</b>           | <b>7.92</b> | <b>0.001</b> | 0.10                  | 2.48         | 0.077        |
|                  | Flooding x Flushing    | <b>0.12</b>                       | <b>4.52</b>  | <b>0.001</b> | <b>0.12</b>           | <b>4.27</b> | <b>0.012</b> | -                     | -            | -            |
|                  | Flooding x High water  | <b>0.10</b>                       | <b>3.63</b>  | <b>0.001</b> | 0.14                  | 5.35        | 0.004        | -                     | -            | -            |
|                  | Flooding x Low water   | <b>0.13</b>                       | <b>4.66</b>  | <b>0.001</b> | 0.09                  | 3.19        | 0.035        | -                     | -            | -            |

|                        |             |             |              |             |              |              |   |   |   |
|------------------------|-------------|-------------|--------------|-------------|--------------|--------------|---|---|---|
| Flushing x High water  | <b>0.17</b> | <b>6.70</b> | <b>0.001</b> | <b>0.33</b> | <b>16.04</b> | <b>0.001</b> | - | - | - |
| Flushing x Low water   | <b>0.13</b> | <b>4.81</b> | <b>0.001</b> | -0.01       | -0.27        | 0.997        | - | - | - |
| High water x Low water | <b>0.20</b> | <b>7.88</b> | <b>0.001</b> | <b>0.34</b> | <b>16.66</b> | <b>0.001</b> | - | - | - |

223

224 In proportion, when we partitioned the beta diversity using presence-absence data, the pairs  
225 of sample units were more associated with greater similarities and replacement values considering all  
226 periods (Figure 4). On the other hand, when we evaluated the partition using abundance data, the  
227 pairs of sample units were more associated with abundance difference component and, secondly, with  
228 higher replacement levels (Figure 5).

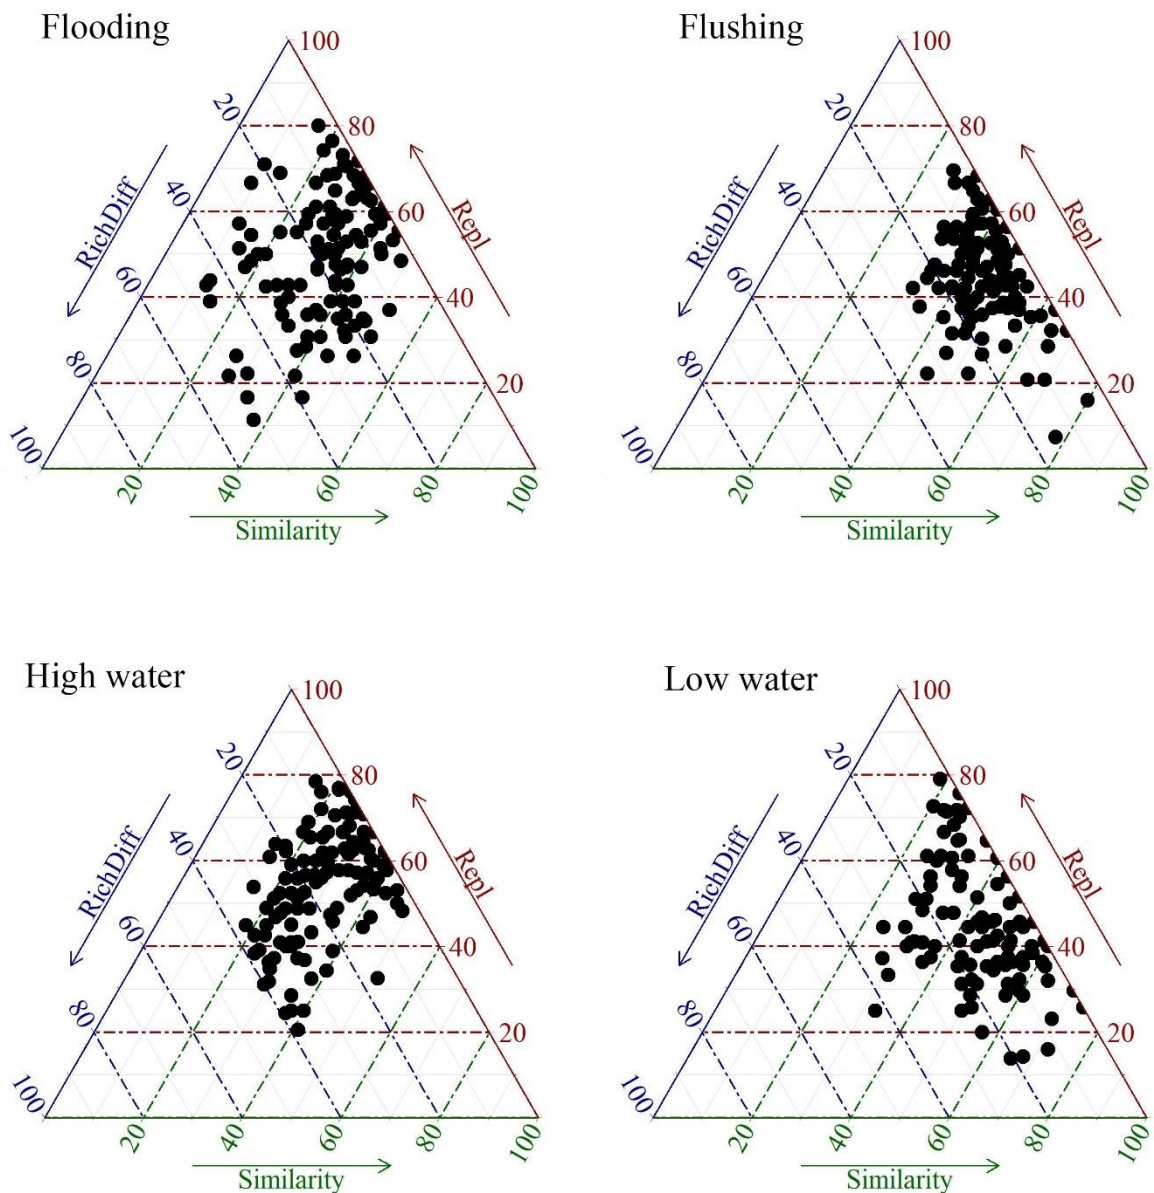

229

230 **Fig. 4** Triangular graph (simplex) of the proportion of elements of the beta diversity partition per pair  
231 of sample units for values of presence-absence of organisms. RichDiff = richness difference and  
232 Repl= species replacement.

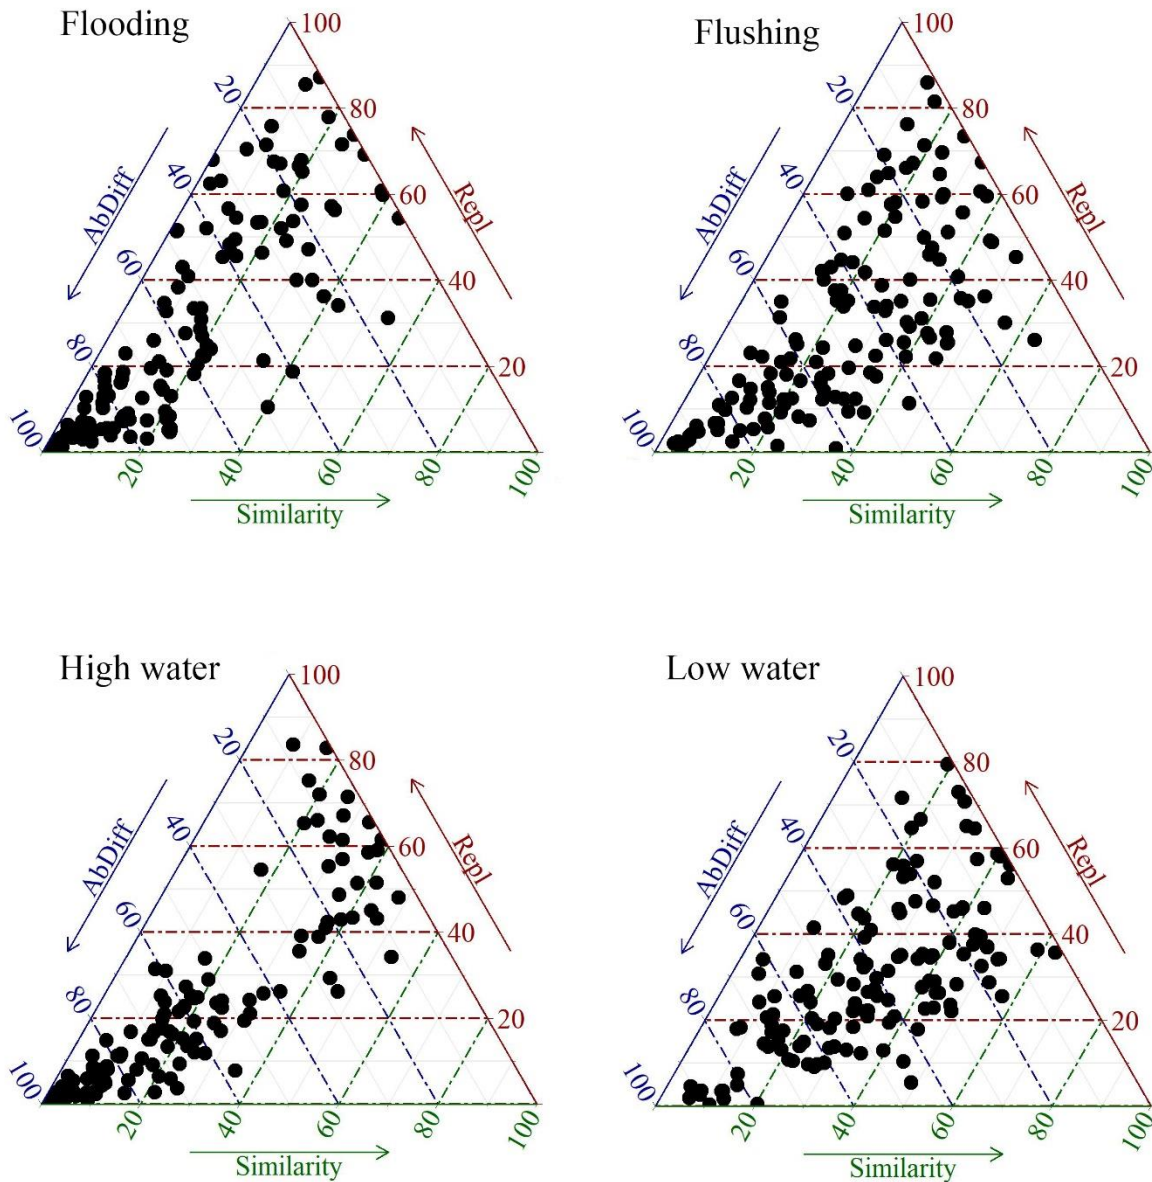

233

234 **Fig. 5** Triangular graph (simplex) of the proportion of elements in the beta diversity partition per pair  
235 of sample units for organism abundance values. AbDiff = abundance difference and Repl = species  
236 abundance replacement.

237

238

239 Because presented high collinearity or multicollinearity values, we removed the following  
240 environmental variables of each hydrological period: total chlorophyll, pH, conductivity and total  
241 dissolved solids (flooding); dissolved oxygen, pH, conductivity and total dissolved nitrogen  
242 (flushing); temperature, conductivity and total dissolved solids (high water) and dissolved oxygen,  
243 blue-green algae, pH, conductivity and total dissolved nitrogen (low water).

244 The environmental and spatial variables showed little influence on the distribution patterns of  
245 beta diversity and its components, regardless the hydrological period (Table 3). Considering the

246 presence-absence species data, the environmental variables explained the beta diversity patterns in  
247 flushing and low waters periods and the richness difference component in in the low water period.  
248 Regarding the abundance data, the environmental variables explained the beta diversity and the  
249 abundance difference component in the high water period (Table 3).

250           Concerning the presence-absence values, spatial variables explained the beta diversity  
251 patterns in flooding, flushing, and low water periods, and replacement component in flushing and low  
252 water periods. However, concerning the abundance data, spatial variables did not explain beta  
253 diversity nor its components in any of the hydrological periods analyzed (Table 3).

254

255 **Table 3.** Distance-based redundancy analysis (dbRDA) of the influence of environmental and spatial predictors on the matrices resulting from the  
 256 beta diversity partition. Rep = replacement; RD = richness difference; AD = abundance difference. Significant values are in bold

| Data             | Season     | Environmental variables              |             |              |                                      |          |          |                                      |             |              | Spatial variables                    |              |              |                                      |             |              |                                      |          |          |
|------------------|------------|--------------------------------------|-------------|--------------|--------------------------------------|----------|----------|--------------------------------------|-------------|--------------|--------------------------------------|--------------|--------------|--------------------------------------|-------------|--------------|--------------------------------------|----------|----------|
|                  |            | Beta diversity<br>(Jaccard)          |             |              | Rep                                  |          |          | RD                                   |             |              | Beta diversity<br>(Jaccard)          |              |              | Rep                                  |             |              | RD                                   |          |          |
|                  |            | <i>R</i> <sup>2</sup> <sub>adj</sub> | <i>F</i>    | <i>p</i>     | <i>R</i> <sup>2</sup> <sub>adj</sub> | <i>F</i> | <i>p</i> | <i>R</i> <sup>2</sup> <sub>adj</sub> | <i>F</i>    | <i>p</i>     | <i>R</i> <sup>2</sup> <sub>adj</sub> | <i>F</i>     | <i>p</i>     | <i>R</i> <sup>2</sup> <sub>adj</sub> | <i>F</i>    | <i>p</i>     | <i>R</i> <sup>2</sup> <sub>adj</sub> | <i>F</i> | <i>p</i> |
| Presence-Absence | Flooding   | 0.07                                 | 1.09        | 0.290        | 0.01                                 | 1.01     | 0.453    | 0.09                                 | 1.13        | 0.425        | <b>0.05</b>                          | <b>1.275</b> | <b>0.034</b> | 0.01                                 | 1.06        | 0.251        | 0.03                                 | 1.19     | 0.300    |
|                  | Flushing   | <b>0.31</b>                          | <b>1.61</b> | <b>0.008</b> | 0.09                                 | 1.13     | 0.125    | 0.37                                 | 1.79        | 0.124        | <b>0.14</b>                          | <b>1.848</b> | <b>0.001</b> | <b>0.06</b>                          | <b>1.33</b> | <b>0.003</b> | 0.02                                 | 1.12     | 0.356    |
|                  | High water | 0.08                                 | 1.11        | 0.238        | 0.00                                 | 0.97     | 0.665    | 0.32                                 | 1.57        | 0.200        | 0.02                                 | 1.114        | 0.216        | 0.00                                 | 0.93        | 0.841        | 0.14                                 | 1.87     | 0.084    |
|                  | Low water  | <b>0.31</b>                          | <b>1.66</b> | <b>0.005</b> | 0.07                                 | 1.11     | 0.181    | <b>0.45</b>                          | <b>2.19</b> | <b>0.019</b> | <b>0.15</b>                          | <b>1.926</b> | <b>0.002</b> | <b>0.05</b>                          | <b>1.26</b> | <b>0.020</b> | 0.13                                 | 1.83     | 0.072    |
| Abundance        | Flooding   | 0.02                                 | 1.02        | 0.494        | 0.02                                 | 1.02     | 0.375    | -0.04                                | 0.95        | 0.574        | 0.03                                 | 1.156        | 0.257        | 0.01                                 | 1.04        | 0.316        | -0.01                                | 0.95     | 0.462    |
|                  | Flushing   | 0.06                                 | 1.09        | 0.407        | -0.01                                | 0.98     | 0.615    | 0.07                                 | 1.10        | 0.430        | 0.08                                 | 1.474        | 0.080        | 0.01                                 | 1.06        | 0.252        | 0.02                                 | 1.12     | 0.325    |
|                  | High water | <b>0.54</b>                          | <b>2.42</b> | <b>0.007</b> | -0.10                                | 0.89     | 0.974    | <b>0.63</b>                          | <b>3.06</b> | <b>0.008</b> | 0.07                                 | 1.372        | 0.159        | -0.01                                | 0.93        | 0.831        | 0.09                                 | 1.51     | 0.138    |
|                  | Low water  | 0.25                                 | 1.49        | 0.089        | -0.03                                | 0.96     | 0.746    | 0.23                                 | 1.44        | 0.163        | 0.03                                 | 1.168        | 0.256        | 0.02                                 | 1.09        | 0.090        | -0.02                                | 0.88     | 0.577    |

258 Regarding the concordance analyzes, zooplankton beta diversity and its components  
 259 showed low values between hydrological periods (Table 4). Taking into account the presence  
 260 and absence species data, there was concordance of beta diversity only in the comparisons  
 261 between low water and flushing periods, and low water and high water periods (Table 4).  
 262 Concerning the beta diversity components, there was concordance only in the comparisons  
 263 between high water and low water (richness difference component) and between flooding and  
 264 flushing (richness replacement component) and flooding and low water (richness replacement  
 265 component). On the other hand, the abundance data did not show concordant patterns between  
 266 the hydrological periods.

267

268 **Table 4.** Procrustes test evaluating the concordance of beta diversity and its components values  
 269 between hydrological periods. Significant values are in bold

270

|                  |                        | Beta diversity |              |                      |              |             |              |
|------------------|------------------------|----------------|--------------|----------------------|--------------|-------------|--------------|
| Season           |                        | (Jaccard)      |              | Richness difference  |              | Replacement |              |
|                  |                        | <i>r</i>       | <i>p</i>     | <i>r</i>             | <i>p</i>     | <i>r</i>    | <i>p</i>     |
| Presence-absence | Flooding x Flushing    | 0.39           | 0.153        | 0.38                 | 0.173        | <b>0.62</b> | <b>0.003</b> |
|                  | Flooding x High water  | 0.42           | 0.096        | 0.17                 | 0.832        | 0.41        | 0.124        |
|                  | Flooding x Low water   | 0.45           | 0.088        | 0.26                 | 0.468        | <b>0.49</b> | <b>0.031</b> |
|                  | Flushing x High water  | 0.42           | 0.110        | 0.13                 | 0.917        | 0.46        | 0.058        |
|                  | Flushing x Low water   | <b>0.47</b>    | <b>0.045</b> | 0.27                 | 0.404        | 0.36        | 0.242        |
|                  | High water x Low water | <b>0.69</b>    | <b>0.001</b> | <b>0.66</b>          | <b>0.001</b> | 0.41        | 0.125        |
|                  |                        | Beta diversity |              |                      |              |             |              |
| Season           |                        | (Ruzicka)      |              | Abundance difference |              | Replacement |              |
|                  |                        | <i>r</i>       | <i>p</i>     | <i>r</i>             | <i>p</i>     | <i>r</i>    | <i>p</i>     |
| Abundance        | Flooding x Flushing    | 0.26           | 0.522        | 0.06                 | 0.909        | 0.27        | 0.574        |
|                  | Flooding x High water  | 0.35           | 0.205        | 0.25                 | 0.277        | 0.27        | 0.543        |
|                  | Flooding x Low water   | 0.35           | 0.241        | 0.22                 | 0.398        | 0.19        | 0.823        |
|                  | Flushing x High water  | 0.35           | 0.208        | 0.34                 | 0.196        | 0.19        | 0.847        |
|                  | Flushing x Low water   | 0.44           | 0.075        | 0.18                 | 0.602        | 0.36        | 0.253        |
|                  | High water x Low water | 0.23           | 0.555        | 0.09                 | 0.974        | 0.17        | 0.890        |

271

272 **Discussion**

## 273 Local contributions to beta diversity

274

275 When evaluating the beta diversity local contributions patterns using the presence-  
276 absence data, we found that the main contribution sites were located in the south during flooding  
277 and low water periods. This lake region has a higher proportion of areas with pastoral use  
278 (Peres, Gurgel & Laques, 2018) and also the highest proportion of *igarapés* area. On the other  
279 hand, the northern region connects more predominantly with the Amazon River (Bonnet *et al.*,  
280 2008). Given that the variation in species composition and abundance influence the LCBD  
281 contributions, the land use may have influenced the difference in species composition between  
282 sites, what, consequently, influenced the increase the beta diversity contribution.

283 The significant LCBD site located in the southern region presented the lowest richness  
284 of individuals per sampling unit during the flooding period, while in the flushing period, it  
285 showed a different occurrence of species comparing to the other sites. High LCBD values may  
286 not be directly associated with high richness or abundance values, since areas with low richness  
287 and occurrences of differentiated species may also present higher contribution values, which  
288 may denote these areas as priorities for species conservation (Legendre & De Cáceres, 2013).

289 In the flooding and flushing periods, some sites in the northern region were  
290 differentiated concerning organism abundance. There was low abundance of zooplanktonic  
291 organisms at the significant site during the flooding period. Moreover, in flushing, the sampling  
292 unit ten, which most contributed to the beta diversity, stood out for the occurrence of different  
293 species compared to others sampling units in the same period (e.g., *Lecane elsa*, *Lecane luna*  
294 and *Nebela collaris*). In the low water period, the sampling unit also showed distinct species  
295 (e.g., *Diffflugia elegans*). This distinction in the diversity patterns of the sampling units by  
296 hydrological period showed that the flood pulse promoted different dynamics in the floodplain  
297 lake. In the low water period, the sampling units were isolated from the main river, which means  
298 that the considerable environmental heterogeneity may have been influenced differences in  
299 species with different characteristics in each sampling period (Thomaz *et al.*, 2007). In this  
300 case, as the sampling unit two, which has a higher LCBD value, is on the opposite side of the  
301 most important contribution area of the river's water flow, located to the east, the isolation of  
302 the site may have justified such differentiation.

303 Whereas zooplanktonic organisms respond effectively to environmental variations  
304 (Vieira *et al.*, 2011; Wang *et al.*, 2016) and even greater impacts such as hydrological changes  
305 in cases of dams (Souza *et al.*, 2019), we consider that the sampling units highlighted  
306 accordingly to the criteria of uniqueness by the LCBD analysis, being always associated with

307 the marginal regions of the lake. These regions have higher interactions with *igarapés* and are  
308 in contact with the aquatic-terrestrial transition zones. Therefore, despite the hydrological  
309 importance of the flood pulse over the lake and the control over ecological dynamics, it is also  
310 important to take into account the importance that these *igarapés* and vegetation areas have for  
311 the existence of unique sites in relation to biodiversity for the Lago Grande do Curuai.

312

### 313 Beta diversity partition

314 Related to the presence-absence data, there was a predominance of replacement  
315 concerning total beta diversity. It means that, despite a greater constancy in species richness per  
316 sampling unit, the species composition between pairs of units was different. Species are  
317 expected to show a substitution pattern over large environmental gradients, depending on other  
318 factors such as ecological tolerance of species (Legendre, 2014). Some studies report the  
319 sensitivity of organisms in the zooplankton community to environmental variations (Vieira *et*  
320 *al.*, 2011), in some cases responding through changes in the trophic structure of the community  
321 (Ejsmont-Karabin *et al.*, 2018) and changes in reproductive rates and species composition in  
322 the presence of other organisms (e.g., fish) (Feniova *et al.*, 2019).

323 The high water period showed the highest beta diversity values and species replacement  
324 rate. It differed from our expectations, since we expected a greater environmental homogeneity  
325 and consequent biological homogeneity, reflecting a higher biological similarity between the  
326 sites due to the flood pulse in the high water period and due to the greater interconnectivity  
327 between habitats (Thomaz *et al.*, 2007; Bozelli *et al.*, 2015). Despite this, the increase in beta  
328 diversity values may have been attributable to a greater interaction area with the floodplain that  
329 began during the flooding period (Junk *et al.*, 1989) and continued to settle during the high  
330 water period. This same pattern may have justified the lower beta diversity and replacement  
331 values in low water and flushing periods where, despite the isolation of habitats promoted by  
332 the reduction in the water volume, consequently minimized the interaction with the floodplain  
333 region and the main river.

334 On the other hand, although the beta diversity patterns using abundance data were the  
335 same for the presence-absence data with the highest values in the high water and flooding  
336 periods, the abundance difference component predominated over the replacement component.  
337 These values denote that, despite a greater tendency to replace species along the environmental  
338 gradient, these species had wide variations in abundance values. It highlighted the importance  
339 of understanding the zooplankton community abundance variations that, despite the ability to  
340 respond to environmental variations (e.g., variation in trophic status and phosphorus



341 concentration in water), is often overlooked in some ecological studies (García-Chicote,  
342 Armengol & Rojo, 2018).

343

344 Environmental and spatial predictors

345 Despite the distinctions observed in the patterns of similarity and substitution of species  
346 between hydrological periods, we observed that the environmental variables showed little  
347 prediction about the diversity patterns of the zooplankton community for presence and absence  
348 data. These variables explained only the patterns of similarity in the flushing and low water  
349 periods and the richness difference in the low water period.

350 On the other hand, there was a higher pattern of prediction of spatial variables over  
351 patterns of similarity in the composition of species, not explaining only in the high water period.  
352 These values denote that spatial variation may have a greater control over the organisms  
353 composition dynamics than environmental variation. Despite this, this control was only related  
354 to presence-absence values. The patterns of organism abundance and presence-absence refer to  
355 different factors. For example, for presence and absence data, beta diversity corresponding to  
356 the inverse of similarity in the composition is prioritized (Podani & Schmera, 2011), while for  
357 abundance data, besides the composition, variations in the number of individuals of each  
358 species are also considered. Therefore, when abundance is taken into account, sites with high  
359 species dissimilarity values are those that present a high distinction in species composition and  
360 the corresponding organisms abundance (Podani *et al.*, 2013).

361 Therefore, the explanation obtained in the low water period using the presence-absence  
362 data may be related to the heterogeneity of ecological niches (Legendre, 2014). The low water  
363 period may have promoted the existence of different niches, some with more species and others  
364 with fewer species, due to the isolation. The substitution of species explained spatially may also  
365 be based on the isolation that makes the species of an environment unable to reach other places  
366 (Thomaz *et al.*, 2007). For this reason, spatial isolation can drive the pattern of differentiation  
367 of species within the habitat and this same pattern may explain the spatial prediction in the  
368 period of flushing.

369 For the beta diversity components using abundance data, there was a low standard of  
370 explanation for both environmental and spatial variables, which showed that there was a greater  
371 complexity of factors (e.g., competition and predation) that may have been the most responsible  
372 for these variations and that were not evaluated in this study. This low pattern of response shows  
373 that the zooplankton community is not responding only to environmental variations at that time,  
374 but to changes that occurred in other periods before the sampling carried out. Besides, as the

375 abundance and presence-absence data responded differently to different factors, we emphasize  
376 that both approaches can be complementary when used for biological monitoring purposes.

377

378 Temporal concordance between beta diversity components

379

380 Despite the occurrence of significant values when evaluating the temporal concordance  
381 between the beta diversity patterns using presence-absence values, no pair of periods showed  
382 concordance between all the diversity patterns over the hydrological cycle. There was also no  
383 concordance between the periods using the abundance values. These results are in agreement  
384 with our expectations since even in other environments, there is a low standard of predictability  
385 and synchrony of zooplankton with other variables that allow us to predict a constant and  
386 predictable pattern for this community (Vieira *et al.*, 2019).

387 These results also show that the environmental and biological dynamics of the  
388 floodplains are complex to be predictable and, depending on the hydrological period, which  
389 changes the entrance of river sediments and the inflow or outflow of water in the floodplain,  
390 and the evaluated group, the structuring of the communities can be different (Amoros &  
391 Bornette, 2002). There are proposals that the dynamics are so distinct and susceptible to  
392 hydrological variations that the high water period acts as a resumption of the successional  
393 regime of the structure and composition of the zooplankton community (Baranyi *et al.*, 2002;  
394 Bozelli *et al.*, 2015). Therefore, despite the economic advantages of sampling in less  
395 hydrological periods, we found that, in order to understand the beta diversity patterns of the  
396 zooplankton community, sampling are necessary to occur in all the hydrological periods of high  
397 and low waters, as well as in the flood and ebb intermediate periods.

## 398 **Conclusions**

399 Hydrological variations govern the zooplankton community dynamics, thus the  
400 contribution of different locations depending on the hydrological period evaluated. With some  
401 exceptions, the sites that most contributed to the beta diversity presented less organism richness  
402 or abundance and also showed proximity to the coastal regions of the lake, especially those  
403 associated with *Igarapés* when using the organisms presence-absence data. This result denotes  
404 the relevance of these areas for biological monitoring and for the delimitation of priority areas  
405 for the conservation of zooplankton diversity.

406 Beta diversity was greatest in flooding and high water periods. Despite the differences  
407 in the partition values by hydrological period, the species replacement was dominant in all  
408 hydrological periods using the organisms presence-absence data, while the abundance

409 difference was dominant using the quantitative values of organisms per sample unit. Therefore,  
410 the studies must evaluate both abundance and presence-absence data as a complementary way,  
411 considering that they can portray different processes in the face of environmental and spatial  
412 variations. Due to the complexity of factors that govern the distribution of zooplankton  
413 organisms in floodplains, there was a little prediction of environmental and spatial variables on  
414 the beta diversity distribution patterns for the community. Also, there was a low concordance  
415 between the patterns for the different hydrological periods, which highlights the need to study  
416 the hydrological periods of high and low waters, as well as the transient periods of flooding and  
417 flushing to obtain an adequate assessment of the dynamics distribution patterns of the  
418 zooplankton community from the perspective of beta diversity.

419

## 420 **Acknowledgments**

421

422 The authors thank to Coordenação de Aperfeiçoamento de Pessoal de Nível Superior (CAPES)  
423 for providing financial assistance to L.F.G., to Fondation pour la Recherche sur la Biodiversité  
424 (FRB) and to Conselho Nacional de Desenvolvimento Científico e Tecnológico (CNPq) that, in  
425 partnership with Institut de Recherche pour le Développement (IRD), financed the project  
426 number process: 490634/2013-3.

427

## 428 **Data availability statement**

429

430 Data are available on request from the corresponding author.

431

## 432 **References**

433

434 Affonso A., Barbosa C. & Novo E. (2011). Water quality changes in floodplain lakes due to  
435 the Amazon River flood pulse: Lago Grande de Curuaí (Pará). *Brazilian Journal of*  
436 *Biology* **71**, 601–610. <https://doi.org/10.1590/S1519-69842011000400004>

437 Amoros C. & Bornette G. (2002). Connectivity and biocomplexity in waterbodies of riverine  
438 floodplains. *Freshwater Biology* **47**, 761–776. <https://doi.org/10.1046/j.1365-2427.2002.00905.x>

440 APHA (2005). *Standard Methods for the Examination of Water and Wastewater*, 21st edn.  
441 American Public Health Association/American Water Works Association/Water  
442 Environment Federation, Washington DC.

- 443 Baranyi C., Hein T., Holarek C., Keckeis S. & Schiemer F. (2002). Zooplankton biomass and  
444 community structure in a Danube River floodplain system: effects of hydrology.  
445 *Freshwater Biology* **47**, 473–482. <https://doi.org/10.1046/j.1365-2427.2002.00822.x>
- 446 Baselga A. (2010). Partitioning the turnover and nestedness components of beta diversity.  
447 *Global Ecology and Biogeography* **19**, 134–143. [https://doi.org/10.1111/j.1466-](https://doi.org/10.1111/j.1466-8238.2009.00490.x)  
448 [8238.2009.00490.x](https://doi.org/10.1111/j.1466-8238.2009.00490.x)
- 449 Bonnet M.P., Barroux G., Martinez J.M., Seyler F., Moreira-Turcq P., Cochonneau G., *et al.*  
450 (2008). Floodplain hydrology in an Amazon floodplain lake (Lago Grande de Curuaí).  
451 *Journal of Hydrology* **349**, 18–30. <https://doi.org/10.1016/j.jhydrol.2007.10.055>
- 452 Borcard D., Gillet F. & Legendre P. (2018). *Numerical Ecology with R*. Springer International  
453 Publishing, Cham.
- 454 Bottrell H.H., Duncan A., Gliwicz Z.M., Grygierek E., Herzig A., Hillbricht-Ilkowska A., *et al.*  
455 (1976). Review of some problems in zooplankton production studies. *Norwegian Journal*  
456 *of Zoology* **24**, 419–456
- 457 Bozelli R.L., Thomaz S.M., Padial A.A., Lopes P.M. & Bini L.M. (2015). Floods decrease  
458 zooplankton beta diversity and environmental heterogeneity in an Amazonian floodplain  
459 system. *Hydrobiologia* **753**, 233–241. <https://doi.org/10.1007/s10750-015-2209-1>
- 460 Carneiro F.M., Nabout J.C., Vieira L.C.G., Lodi S. & Bini L.M. (2013). Higher Taxa Predict  
461 Plankton Beta-diversity Patterns Across an Eutrophication Gradient. *Natureza &*  
462 *Conservação* **11**, 43–47. <https://doi.org/10.4322/natcon.2013.006>
- 463 Chambers J.M. (2013). SoDA: Functions and Examples for “Software for Data Analysis”
- 464 Dray S., Blanchet G., Borcard D., Clappe S., Guenard G., Jombart T., *et al.* (2018). *adespatial*:  
465 Multivariate Multiscale Spatial Analysis. *R package version 0.1-1*
- 466 Dray S., Legendre P. & Peres-Neto P.R. (2006). Spatial modelling: a comprehensive  
467 framework for principal coordinate analysis of neighbour matrices (PCNM). *Ecological*  
468 *Modelling* **196**, 483–493. <https://doi.org/10.1016/j.ecolmodel.2006.02.015>
- 469 Ejsmont-Karabin J., Feniova I., Kostrzewska-Szlakowska I., Rzepecki M., Petrosyan V.G. &  
470 Dzialowski A.R. (2018). Factors influencing phosphorus regeneration by lake  
471 zooplankton—An experimental approach. *Limnologica* **70**, 58–64.  
472 <https://doi.org/10.1016/j.limno.2018.01.003>
- 473 Feniova I., Sakharova E., Karpowicz M., Gladyshev M.I., Sushchik N.N., Dawidowicz P., *et*  
474 *al.* (2019). Direct and Indirect Impacts of Fish on Crustacean Zooplankton in  
475 Experimental Mesocosms. *Water* **11**, 2090. <https://doi.org/10.3390/w11102090>
- 476 García-Chicote J., Armengol X. & Rojo C. (2018). Zooplankton abundance: A neglected key

- 477 element in the evaluation of reservoir water quality. *Limnologica* **69**, 46–54.  
478 <https://doi.org/10.1016/j.limno.2017.11.004>
- 479 Gower J.C. (1975). Generalized procrustes analysis. *Psychometrika* **40**, 33–51.  
480 <https://doi.org/10.1007/BF02291478>
- 481 Guisan A. & Thuiller W. (2005). Predicting species distribution: offering more than simple  
482 habitat models. *Ecology Letters* **8**, 993–1009. [https://doi.org/10.1111/j.1461-](https://doi.org/10.1111/j.1461-0248.2005.00792.x)  
483 [0248.2005.00792.x](https://doi.org/10.1111/j.1461-0248.2005.00792.x)
- 484 Junk W.J., Bayley P.B. & Sparks R.E. (1989). The flood pulse concept in river-floodplain  
485 systems. *Canadian special publication of fisheries and aquatic sciences* **106**, 110–127
- 486 Junk W.J., Piedade M.T.F., Schöngart J., Cohn-Haft M., Adeney J.M. & Wittmann F. (2011).  
487 A Classification of Major Naturally-Occurring Amazonian Lowland Wetlands. *Wetlands*  
488 **31**, 623–640. <https://doi.org/10.1007/s13157-011-0190-7>
- 489 Junk W.J., Piedade M.T.F., Schöngart J. & Wittmann F. (2012). A classification of major  
490 natural habitats of Amazonian white-water river floodplains (várzeas). *Wetlands Ecology*  
491 *and Management* **20**, 461–475. <https://doi.org/10.1007/s11273-012-9268-0>
- 492 Legendre P. (2014). Interpreting the replacement and richness difference components of beta  
493 diversity. *Global Ecology and Biogeography* **23**, 1324–1334.  
494 <https://doi.org/10.1111/geb.12207>
- 495 Legendre P. & Andersson M.J. (1999). Distance-based redundancy analysis: Testing  
496 multispecies responses in multifactorial ecological experiments. *Ecological Monographs*  
497 **69**, 1–24. [https://doi.org/10.1890/0012-9615\(1999\)069\[0001:DBRATM\]2.0.CO;2](https://doi.org/10.1890/0012-9615(1999)069[0001:DBRATM]2.0.CO;2)
- 498 Legendre P. & De Cáceres M. (2013). Beta diversity as the variance of community data:  
499 dissimilarity coefficients and partitioning. *Ecology Letters* **16**, 951–963.  
500 <https://doi.org/10.1111/ele.12141>
- 501 Legendre P. & Legendre L. (2012). *Numerical ecology*, Third. Elsevier, Amsterdam.
- 502 de Moraes Novo E.M.L., de Farias Barbosa C.C., de Freitas R.M., Shimabukuro Y.E., Melack  
503 J.M. & Filho W.P. (2006). Seasonal changes in chlorophyll distributions in Amazon  
504 floodplain lakes derived from MODIS images. *Limnology* **7**, 153–161.  
505 <https://doi.org/10.1007/s10201-006-0179-8>
- 506 de Moraes G.F., dos Santos Ribas L.G., Ortega J.C.G., Heino J. & Bini L.M. (2018).  
507 Biological surrogates: A word of caution. *Ecological Indicators* **88**, 214–218.  
508 <https://doi.org/10.1016/j.ecolind.2018.01.027>
- 509 Oksanen J., Blanchet, Guillaume F., Friendly M., Kindt R., Legendre P., Mcglinn D., *et al.*  
510 (2016). Vegan: Community Ecology Package. *R package version 2.4-0*

- 511 Oksanen J., Blanchet F.G., Kindt R., Legendre P., Minchin P.R., O'hara R.B., *et al.* (2013).  
512 Package 'vegan.' *Community ecology package, version 2*
- 513 Peres L.G.M., Gurgel H. & Laques A.-E. (2018). Dinâmica da paisagem em planícies de  
514 inundação amazônicas: o caso do Lago Grande do Curuai, Pará, Brasil. *Confins. Revue*  
515 *franco-brésilienne de géographie/Revista franco-brasilera de geografia*
- 516 Podani J., Ricotta C. & Schmera D. (2013). A general framework for analyzing beta diversity,  
517 nestedness and related community-level phenomena based on abundance data.  
518 *Ecological Complexity* **15**, 52–61. <https://doi.org/10.1016/j.ecocom.2013.03.002>
- 519 Podani J. & Schmera D. (2011). A new conceptual and methodological framework for  
520 exploring and explaining pattern in presence - absence data. *Oikos* **120**, 1625–1638.  
521 <https://doi.org/10.1111/j.1600-0706.2011.19451.x>
- 522 R Core Team (2016). R: A Language and Environment for Statistical Computing
- 523 Socolar J.B., Gilroy J.J., Kunin W.E. & Edwards D.P. (2016). How Should Beta-Diversity  
524 Inform Biodiversity Conservation? *Trends in Ecology & Evolution* **31**, 67–80.  
525 <https://doi.org/10.1016/j.tree.2015.11.005>
- 526 Souza C.A. de, Vieira L.C.G., Legendre P., Carvalho P. de, Velho L.F.M. & Beisner B.E.  
527 (2019). Damming interacts with the flood pulse to alter zooplankton communities in an  
528 Amazonian river. *Freshwater Biology*, fw.13284. <https://doi.org/10.1111/fwb.13284>
- 529 Thomaz S.M., Bini L.M. & Bozelli R.L. (2007). Floods increase similarity among aquatic  
530 habitats in river-floodplain systems. *Hydrobiologia* **579**, 1–13.  
531 <https://doi.org/10.1007/s10750-006-0285-y>
- 532 Vieira A.C.B., Medeiros A.M.A., Ribeiro L.L. & Crispim M.C. (2011). Population dynamics  
533 of *Moina minuta* Hansen (1899), *Ceriodaphnia cornuta* Sars (1886), and *Diaphanosoma*  
534 *spinulosum* Herbst (1967) (Crustacea: Branchiopoda) in different nutrients (N and P)  
535 concentration ranges. *Acta Limnologica Brasiliensia* **23**, 48–56.  
536 <https://doi.org/10.4322/actalb.2011.018>
- 537 Vieira M.C., Bini L.M., Velho L.F.M., Gomes L.F., Nabout J.C. & Vieira L.C.G. (2017).  
538 Biodiversity shortcuts in biomonitoring of novel ecosystems. *Ecological Indicators* **82**,  
539 505–512. <https://doi.org/10.1016/j.ecolind.2017.07.025>
- 540 Vieira M.C., Roitman I., de Oliveira Barbosa H., Machado Velho L.F. & Cardoso Galli Vieira  
541 L. (2019). Spatial synchrony of zooplankton during the impoundment of amazonic  
542 reservoir. *Ecological Indicators* **98**, 649–656.  
543 <https://doi.org/10.1016/j.ecolind.2018.11.040>
- 544 Wang C., Wang L., Deng D. & Zhou Z. (2016). Temporal and spatial variations in rotifer

- 545 correlations with environmental factors in Shengjin Lake, China. *Environmental Science*  
546 *and Pollution Research* **23**, 8076–8084. <https://doi.org/10.1007/s11356-015-6009-y>
- 547 Whittaker R.H. (1960). Vegetation of the Siskiyou Mountains, Oregon and California.  
548 *Ecological Monographs* **30**, 279–338. <https://doi.org/10.2307/1943563>
- 549
